# Supplementary material for: Assessment of Medical Cannabis and Health-Related Quality of Life
Source: PubMed Central journal article supplement — JAMA Netw Open. 2023 May 9;6(5):e2312522. doi: 10.1001/jamanetworkopen.2023.12522 (PMC10170337; doi:10.1001/jamanetworkopen.2023.12522), 2023-05-09

## Supplemental Online Content

Arkell TR, Downey LA, Hayley AC, Roth S. Assessment of medical cannabis and health-related quality of life. *JAMA Netw Open*. 2023;6(5):e2312522. doi:10.1001/jamanetworkopen.2023.12522

**eTable 1.** Data Availability on Quality of Life (SF-36) Measures by Follow-up

**eTable 2.** OLS Regression Results, Estimating General Health (Increasing From 0 to 100)

**eTable 3.** OLS Regression Results, Estimating Bodily Pain (Decreasing From 0 to 100)

**eTable 4.** OLS Regression Results, Estimating Physical Functioning (Increasing From 0 to 100)

**eTable 5.** OLS Regression Results, Estimating Role-Physical (Decreasing From 0 to 100)

**eTable 6.** OLS Regression Results, Estimating Mental Health (Increasing From 0 to 100)

**eTable 7.** OLS Regression Results, Estimating Role-Emotional (Decreasing From 0 to 100)

**eTable 8.** OLS Regression Results, Estimating Social Functioning (Increasing From 0 to 100)

**eTable 9.** OLS Regression Results, Estimating Vitality (Increasing From 0 to 100)

**eTable 10.** Reported Adverse Events Across Different Severity Levels

**eFigure.** Flow of Patients Through the Study of the Association of Medicinal Cannabis With Health-Related Quality of Life

This supplemental material has been provided by the authors to give readers additional information about their work.

**eTable 1.** Data availability on quality of life (SF-36) measures by follow-up.

| Follow-up:                            | 0 <sup>a</sup>  | 1             | 2             | 3             | 4             | 5             | 6             | 7             | 8             | 9             | 10            | 11            | 12            | 13            | 14            | 15           |
|---------------------------------------|-----------------|---------------|---------------|---------------|---------------|---------------|---------------|---------------|---------------|---------------|---------------|---------------|---------------|---------------|---------------|--------------|
| General health<br>(% of sample)       | 3,096<br>(78.3) | 328<br>(10.4) | 405<br>(15.1) | 717<br>(33.1) | 616<br>(34.7) | 545<br>(37.2) | 516<br>(44.0) | 384<br>(39.3) | 347<br>(44.4) | 257<br>(40.2) | 224<br>(43.7) | 167<br>(39.4) | 148<br>(41.2) | 127<br>(42.6) | 109<br>(43.1) | 84<br>(40.2) |
| Bodily pain<br>(% of sample)          | 3,117<br>(78.8) | 333<br>(10.5) | 411<br>(15.3) | 725<br>(33.5) | 622<br>(35.1) | 548<br>(37.4) | 523<br>(44.5) | 387<br>(39.6) | 347<br>(44.4) | 263<br>(41.1) | 226<br>(44.1) | 171<br>(40.3) | 148<br>(41.2) | 127<br>(42.6) | 109<br>(43.1) | 85<br>(40.7) |
| Physical functioning<br>(% of sample) | 3,124<br>(79.0) | 336<br>(10.6) | 412<br>(15.4) | 724<br>(33.5) | 628<br>(35.4) | 550<br>(37.5) | 525<br>(44.7) | 389<br>(39.8) | 347<br>(44.4) | 263<br>(41.1) | 226<br>(44.1) | 175<br>(41.3) | 148<br>(41.2) | 129<br>(43.3) | 108<br>(42.7) | 85<br>(40.7) |
| Role-physical<br>(% of sample)        | 3,105<br>(78.5) | 334<br>(10.5) | 413<br>(15.4) | 723<br>(33.4) | 627<br>(35.4) | 549<br>(37.5) | 525<br>(44.7) | 386<br>(39.5) | 346<br>(44.2) | 262<br>(40.9) | 227<br>(44.2) | 173<br>(40.8) | 148<br>(41.2) | 128<br>(43.0) | 109<br>(43.1) | 84<br>(40.2) |
| Mental health<br>(% of sample)        | 3,103<br>(78.4) | 329<br>(10.4) | 408<br>(15.2) | 716<br>(33.1) | 615<br>(34.7) | 546<br>(37.3) | 514<br>(43.8) | 386<br>(39.5) | 347<br>(44.4) | 259<br>(40.5) | 226<br>(44.1) | 170<br>(40.1) | 148<br>(41.2) | 128<br>(43.0) | 109<br>(43.1) | 84<br>(40.2) |
| Role-emotional<br>(% of sample)       | 3,108<br>(78.6) | 336<br>(10.6) | 414<br>(15.4) | 726<br>(33.5) | 625<br>(35.3) | 549<br>(37.5) | 525<br>(44.7) | 387<br>(39.6) | 347<br>(44.4) | 262<br>(40.9) | 227<br>(44.2) | 173<br>(40.8) | 148<br>(41.2) | 128<br>(43.0) | 109<br>(43.1) | 85<br>(40.7) |
| Social functioning<br>(% of sample)   | 3,081<br>(77.9) | 319<br>(10.1) | 387<br>(14.4) | 697<br>(32.2) | 609<br>(34.3) | 531<br>(36.2) | 501<br>(42.7) | 375<br>(38.4) | 335<br>(42.8) | 250<br>(39.1) | 221<br>(43.1) | 163<br>(38.4) | 145<br>(40.4) | 125<br>(42.0) | 107<br>(42.3) | 81<br>(38.8) |
| Vitality<br>(% of sample)             | 3,103<br>(78.4) | 328<br>(10.4) | 408<br>(15.2) | 718<br>(33.2) | 619<br>(34.9) | 546<br>(37.3) | 516<br>(44.0) | 386<br>(39.5) | 347<br>(44.4) | 259<br>(40.5) | 226<br>(44.1) | 171<br>(40.3) | 148<br>(41.2) | 128<br>(43.0) | 109<br>(43.1) | 84<br>(40.2) |
| # of days elapsed <sup>b</sup>        | 0               | 49            | 86            | 130           | 177           | 221           | 268           | 318           | 363           | 413           | 452           | 492           | 537           | 566           | 602           | 630          |

Notes: <sup>a</sup>Corresponds to the initial assessment at baseline before commencing treatment with medicinal cannabis. <sup>b</sup>Indicates the average number of days that have passed since completing the baseline quality of life (SF-36) survey.

**eTable 2.** OLS regression results, estimating general health (increasing from 0 to 100).

|                                                                | General effect    |                    |                    | Balanced           | CBD-dominant       | THC-dominant       |
|----------------------------------------------------------------|-------------------|--------------------|--------------------|--------------------|--------------------|--------------------|
|                                                                | (1)               | (2)                | (3)                |                    |                    |                    |
| <i>Outcome: General health (mean at baseline = 40.22)</i>      |                   |                    |                    |                    |                    |                    |
| Treatment                                                      | 5.94***<br>(0.60) | 6.22***<br>(0.99)  | 8.42***<br>(0.86)  | 9.06***<br>(0.96)  | 8.67***<br>(0.91)  | 7.06***<br>(1.14)  |
| Other                                                          |                   |                    |                    | 8.06***<br>(0.90)  | 8.12***<br>(0.92)  | 8.55***<br>(0.87)  |
| Primary diagnosis categories <sup>a</sup>                      |                   | Yes                | Yes                | Yes                | Yes                | Yes                |
| # of comorbidities                                             |                   | -1.31***<br>(0.12) |                    |                    |                    |                    |
| # of medications                                               |                   | -0.70***<br>(0.14) | -0.27<br>(0.14)    | -0.27<br>(0.14)    | -0.27<br>(0.14)    | -0.27*<br>(0.14)   |
| Binary indicators for eight medication categories <sup>b</sup> |                   | Yes                | Yes                | Yes                | Yes                | Yes                |
| Age                                                            |                   | 0.15***<br>(0.03)  | -1.25*<br>(0.61)   | -1.26*<br>(0.61)   | -1.25*<br>(0.61)   | -1.23*<br>(0.61)   |
| Female                                                         |                   | -0.67<br>(0.92)    |                    |                    |                    |                    |
| Employed                                                       |                   | 5.02***<br>(1.08)  |                    |                    |                    |                    |
| Nonlinear treatment trend <sup>c</sup>                         |                   | -3.44<br>(1.79)    | -4.37***<br>(1.24) | -4.20***<br>(1.24) | -4.46***<br>(1.25) | -4.50***<br>(1.24) |
| Month- and year-fixed effects                                  |                   | Yes                | Yes                | Yes                | Yes                | Yes                |
| Patient-fixed effects                                          |                   |                    | Yes                | Yes                | Yes                | Yes                |
| # of patients                                                  | 3,096             | 2,663              | 1,552              | 1,552              | 1,552              | 1,552              |
| # of consults                                                  | 16                | 16                 | 16                 | 16                 | 16                 | 16                 |
| <i>N</i>                                                       | 8,070             | 7,016              | 6,597              | 6,597              | 6,597              | 6,597              |
| <i>R</i> <sup>2</sup>                                          | 0.02              | 0.15               | 0.73               | 0.73               | 0.73               | 0.73               |
| Effect sizes [Treatment]                                       | [0.27***]         | [0.28***]          | [0.38***]          | [0.41***]          | [0.39***]          | [0.32***]          |

Notes: Standard errors clustered at the patient level are displayed in parentheses. \*  $p < 0.05$ , \*\*  $p < 0.01$ , \*\*\*  $p < 0.001$ .

<sup>a</sup>Includes binary indicators for simple analgesics, opioids, antidepressants, benzodiazepines, GABA analogues, antipsychotics, compound analgesics, and other pain medications. <sup>b</sup>Includes fixed effects for the primary diagnosis categories of pain, psychiatric, neurological, and other. <sup>c</sup>Measured as the reciprocal of the number of follow-up consults since commencing treatment.

**eTable 3.** OLS regression results, estimating bodily pain (decreasing from 0 to 100).

|                                                                | General effect     |                    |                    | Balanced           | CBD-dominant       | THC-dominant       |
|----------------------------------------------------------------|--------------------|--------------------|--------------------|--------------------|--------------------|--------------------|
|                                                                | (1)                | (2)                | (3)                |                    |                    |                    |
| <i>Outcome: Bodily pain (mean at baseline = 29.85)</i>         |                    |                    |                    |                    |                    |                    |
| Treatment                                                      | 13.12***<br>(0.63) | 15.55***<br>(0.91) | 17.34***<br>(0.98) | 18.03***<br>(1.11) | 17.65***<br>(1.04) | 17.17***<br>(1.24) |
| Other                                                          |                    |                    |                    | 16.95***<br>(1.01) | 16.97***<br>(1.04) | 17.36***<br>(0.99) |
| Primary diagnosis categories <sup>a</sup>                      |                    | Yes                | Yes                | Yes                | Yes                | Yes                |
| # of comorbidities                                             |                    | -0.76***<br>(0.10) |                    |                    |                    |                    |
| # of medications                                               |                    | 0.16<br>(0.13)     | -0.08<br>(0.16)    | -0.07<br>(0.16)    | -0.08<br>(0.16)    | -0.08<br>(0.16)    |
| Binary indicators for eight medication categories <sup>b</sup> |                    | Yes                | Yes                | Yes                | Yes                | Yes                |
| Age                                                            |                    | 0.00<br>(0.03)     | -1.87**<br>(0.70)  | -1.87**<br>(0.70)  | -1.87**<br>(0.70)  | -1.87**<br>(0.70)  |
| Female                                                         |                    | -1.66*<br>(0.84)   |                    |                    |                    |                    |
| Employed                                                       |                    | 6.92***<br>(0.97)  |                    |                    |                    |                    |
| Nonlinear treatment trend <sup>c</sup>                         |                    | -7.76***<br>(1.74) | -8.98***<br>(1.44) | -8.79***<br>(1.44) | -9.08***<br>(1.45) | -8.99***<br>(1.44) |
| Month- and year-fixed effects                                  |                    | Yes                | Yes                | Yes                | Yes                | Yes                |
| Patient-fixed effects                                          |                    |                    | Yes                | Yes                | Yes                | Yes                |
| # of patients                                                  | 3,117              | 2,683              | 1,560              | 1,560              | 1,560              | 1,560              |
| # of consults                                                  | 16                 | 16                 | 16                 | 16                 | 16                 | 16                 |
| <i>N</i>                                                       | 8,142              | 7,069              | 6,618              | 6,618              | 6,618              | 6,618              |
| <i>R</i> <sup>2</sup>                                          | 0.07               | 0.33               | 0.68               | 0.68               | 0.68               | 0.68               |
| Effect sizes [Treatment]                                       | [0.54***]          | [0.64***]          | [0.72***]          | [0.75***]          | [0.73***]          | [0.71***]          |

Notes: Standard errors clustered at the patient level are displayed in parentheses. \*  $p < 0.05$ , \*\*  $p < 0.01$ , \*\*\*  $p < 0.001$ .

<sup>a</sup>Includes binary indicators for simple analgesics, opioids, antidepressants, benzodiazepines, GABA analogues, antipsychotics, compound analgesics, and other pain medications. <sup>b</sup>Includes fixed effects for the primary diagnosis categories of pain, psychiatric, neurological, and other. <sup>c</sup>Measured as the reciprocal of the number of follow-up consults since commencing treatment.

**eTable 4.** OLS regression results, estimating physical functioning (increasing from 0 to 100).

|                                                                | General effect    |                    |                   | Balanced          | CBD-<br>dominant  | THC-<br>dominant  |
|----------------------------------------------------------------|-------------------|--------------------|-------------------|-------------------|-------------------|-------------------|
|                                                                | (1)               | (2)                | (3)               | (4)               | (5)               | (6)               |
| Treatment                                                      | 5.29***<br>(0.78) | 6.24***<br>(1.14)  | 6.60***<br>(1.04) | 6.81***<br>(1.15) | 6.68***<br>(1.09) | 7.18***<br>(1.28) |
| Other                                                          |                   |                    |                   | 6.49***<br>(1.06) | 6.51***<br>(1.10) | 6.55***<br>(1.04) |
| Primary diagnosis categories <sup>a</sup>                      |                   | Yes                | Yes               | Yes               | Yes               | Yes               |
| # of comorbidities                                             |                   | -1.13***<br>(0.13) |                   |                   |                   |                   |
| # of medications                                               |                   | -0.80***<br>(0.15) | 0.24<br>(0.17)    | 0.24<br>(0.17)    | 0.24<br>(0.17)    | 0.24<br>(0.17)    |
| Binary indicators for eight medication categories <sup>b</sup> |                   | Yes                | Yes               | Yes               | Yes               | Yes               |
| Age                                                            |                   | -0.26***<br>(0.03) | -1.26<br>(0.73)   | -1.26<br>(0.73)   | -1.26<br>(0.73)   | -1.27<br>(0.73)   |
| Female                                                         |                   | -3.17**<br>(1.12)  |                   |                   |                   |                   |
| Employed                                                       |                   | 16.29***<br>(1.31) |                   |                   |                   |                   |
| Nonlinear treatment trend <sup>c</sup>                         |                   | -5.24**<br>(2.09)  | -2.80<br>(1.64)   | -2.74<br>(1.65)   | -2.83<br>(1.65)   | -2.75<br>(1.64)   |
| Month- and year-fixed effects                                  |                   | Yes                | Yes               | Yes               | Yes               | Yes               |
| Patient-fixed effects                                          |                   |                    | Yes               | Yes               | Yes               | Yes               |
| # of patients                                                  | 3,124             | 2,690              | 1,563             | 1,563             | 1,563             | 1,563             |
| # of consults                                                  | 16                | 16                 | 16                | 16                | 16                | 16                |
| <i>N</i>                                                       | 8,169             | 7,095              | 6,625             | 6,625             | 6,625             | 6,625             |
| <i>R</i> <sup>2</sup>                                          | 0.01              | 0.33               | 0.79              | 0.79              | 0.79              | 0.79              |
| Effect sizes [Treatment]                                       | [0.17***]         | [0.20***]          | [0.21***]         | [0.22***]         | [0.22***]         | [0.23***]         |

Notes: Standard errors clustered at the patient level are displayed in parentheses. \*  $p < 0.05$ , \*\*  $p < 0.01$ , \*\*\*  $p < 0.001$ .

<sup>a</sup>Includes binary indicators for simple analgesics, opioids, antidepressants, benzodiazepines, GABA analogues, antipsychotics, compound analgesics, and other pain medications. <sup>b</sup>Includes fixed effects for the primary diagnosis categories of pain, psychiatric, neurological, and other. <sup>c</sup>Measured as the reciprocal of the number of follow-up consults since commencing treatment.

**eTable 5.** OLS regression results, estimating role-physical (decreasing from 0 to 100).

|                                                                | General effect     |                    |                    | Balanced           | CBD-dominant       | THC-dominant       |
|----------------------------------------------------------------|--------------------|--------------------|--------------------|--------------------|--------------------|--------------------|
|                                                                | (1)                | (2)                | (3)                |                    |                    |                    |
| <i>Outcome: Role-physical (mean at baseline = 14.02)</i>       |                    |                    |                    |                    |                    |                    |
| Treatment                                                      | 13.37***<br>(0.93) | 14.52***<br>(1.46) | 16.81***<br>(1.65) | 16.73***<br>(1.75) | 17.61***<br>(1.78) | 16.29***<br>(2.20) |
| Other                                                          |                    |                    |                    | 16.86***<br>(1.75) | 15.82***<br>(1.70) | 16.86***<br>(1.64) |
| Primary diagnosis categories <sup>a</sup>                      |                    | Yes                | Yes                | Yes                | Yes                | Yes                |
| # of comorbidities                                             |                    | -1.10***<br>(0.14) |                    |                    |                    |                    |
| # of medications                                               |                    | 0.05<br>(0.16)     | 0.07<br>(0.26)     | 0.07<br>(0.26)     | 0.06<br>(0.26)     | 0.07<br>(0.26)     |
| Binary indicators for eight medication categories <sup>b</sup> |                    | Yes                | Yes                | Yes                | Yes                | Yes                |
| Age                                                            |                    | -0.02<br>(0.04)    | -2.37<br>(1.25)    | -2.37<br>(1.25)    | -2.36<br>(1.25)    | -2.36<br>(1.25)    |
| Female                                                         |                    | -0.82<br>(1.25)    |                    |                    |                    |                    |
| Employed                                                       |                    | 9.20***<br>(1.54)  |                    |                    |                    |                    |
| Nonlinear treatment trend <sup>c</sup>                         |                    | -7.71**<br>(2.68)  | -9.37***<br>(2.59) | -9.40***<br>(2.62) | -9.64***<br>(2.62) | -9.42***<br>(2.59) |
| Month- and year-fixed effects                                  |                    | Yes                | Yes                | Yes                | Yes                | Yes                |
| Patient-fixed effects                                          |                    |                    | Yes                | Yes                | Yes                | Yes                |
| # of patients                                                  | 3,105              | 2,670              | 1,562              | 1,562              | 1,562              | 1,562              |
| # of consults                                                  | 16                 | 16                 | 16                 | 16                 | 16                 | 16                 |
| <i>N</i>                                                       | 8,139              | 7,064              | 6,622              | 6,622              | 6,622              | 6,622              |
| <i>R</i> <sup>2</sup>                                          | 0.03               | 0.16               | 0.49               | 0.49               | 0.49               | 0.49               |
| Effect sizes [Treatment]                                       | [0.46***]          | [0.50***]          | [0.58***]          | [0.58***]          | [0.61***]          | [0.56***]          |

Notes: Standard errors clustered at the patient level are displayed in parentheses. \*  $p < 0.05$ , \*\*  $p < 0.01$ , \*\*\*  $p < 0.001$ .

<sup>a</sup>Includes binary indicators for simple analgesics, opioids, antidepressants, benzodiazepines, GABA analogues, antipsychotics, compound analgesics, and other pain medications. <sup>b</sup>Includes fixed effects for the primary diagnosis categories of pain, psychiatric, neurological, and other. <sup>c</sup>Measured as the reciprocal of the number of follow-up consults since commencing treatment.

**eTable 6.** OLS regression results, estimating mental health (increasing from 0 to 100).

|                                                                | General effect    |                    |                    | Balanced           | CBD-dominant       | THC-dominant       |
|----------------------------------------------------------------|-------------------|--------------------|--------------------|--------------------|--------------------|--------------------|
|                                                                | (1)               | (2)                | (3)                |                    |                    |                    |
| <i>Outcome: Mental health (mean at baseline = 54.06)</i>       |                   |                    |                    |                    |                    |                    |
| Treatment                                                      | 9.35***<br>(0.56) | 9.87***<br>(0.89)  | 11.00***<br>(0.86) | 11.62***<br>(1.00) | 11.07***<br>(0.90) | 11.44***<br>(1.16) |
| Other                                                          |                   |                    |                    | 10.65***<br>(0.88) | 10.91***<br>(0.94) | 10.96***<br>(0.86) |
| Primary diagnosis categories <sup>a</sup>                      |                   | Yes                | Yes                | Yes                | Yes                | Yes                |
| # of comorbidities                                             |                   | -0.96***<br>(0.11) |                    |                    |                    |                    |
| # of medications                                               |                   | 0.50***<br>(0.12)  | -0.10<br>(0.14)    | -0.10<br>(0.14)    | -0.10<br>(0.14)    | -0.10<br>(0.14)    |
| Binary indicators for eight medication categories <sup>b</sup> |                   | Yes                | Yes                | Yes                | Yes                | Yes                |
| Age                                                            |                   | 0.15***<br>(0.03)  | -1.25*<br>(0.63)   | -1.26*<br>(0.63)   | -1.25*<br>(0.63)   | -1.26*<br>(0.63)   |
| Female                                                         |                   | 1.42<br>(0.85)     |                    |                    |                    |                    |
| Employed                                                       |                   | 5.31***<br>(0.88)  |                    |                    |                    |                    |
| Nonlinear treatment trend <sup>c</sup>                         |                   | -3.13<br>(1.64)    | -4.10**<br>(1.27)  | -3.93**<br>(1.27)  | -4.12**<br>(1.27)  | -4.05**<br>(1.27)  |
| Month- and year-fixed effects                                  |                   | Yes                | Yes                | Yes                | Yes                | Yes                |
| Patient-fixed effects                                          |                   |                    | Yes                | Yes                | Yes                | Yes                |
| # of patients                                                  | 3,103             | 2,670              | 1,554              | 1,554              | 1,554              | 1,554              |
| # of consults                                                  | 16                | 16                 | 16                 | 16                 | 16                 | 16                 |
| <i>N</i>                                                       | 8,088             | 7,030              | 6,602              | 6,602              | 6,602              | 6,602              |
| <i>R</i> <sup>2</sup>                                          | 0.04              | 0.18               | 0.69               | 0.69               | 0.69               | 0.69               |
| Effect sizes [Treatment]                                       | [0.42***]         | [0.44***]          | [0.49***]          | [0.52***]          | [0.50***]          | [0.51***]          |

Notes: Standard errors clustered at the patient level are displayed in parentheses. \*  $p < 0.05$ , \*\*  $p < 0.01$ , \*\*\*  $p < 0.001$ .

<sup>a</sup>Includes binary indicators for simple analgesics, opioids, antidepressants, benzodiazepines, GABA analogues, antipsychotics, compound analgesics, and other pain medications. <sup>b</sup>Includes fixed effects for the primary diagnosis categories of pain, psychiatric, neurological, and other. <sup>c</sup>Measured as the reciprocal of the number of follow-up consults since commencing treatment.

**eTable 7.** OLS regression results, estimating role-emotional (decreasing from 0 to 100).

|                                                                | General effect     |                    |                    | Balanced           | CBD-dominant       | THC-dominant       |
|----------------------------------------------------------------|--------------------|--------------------|--------------------|--------------------|--------------------|--------------------|
|                                                                | (1)                | (2)                | (3)                |                    |                    |                    |
| <i>Outcome: Role-emotional (mean at baseline = 28.37)</i>      |                    |                    |                    |                    |                    |                    |
| Treatment                                                      | 16.17***<br>(1.05) | 12.91***<br>(1.72) | 14.19***<br>(2.13) | 15.84***<br>(2.38) | 13.61***<br>(2.24) | 14.12***<br>(2.77) |
| Other                                                          |                    |                    |                    | 13.26***<br>(2.21) | 14.90***<br>(2.27) | 14.19***<br>(2.14) |
| Primary diagnosis categories <sup>a</sup>                      |                    | Yes                | Yes                | Yes                | Yes                | Yes                |
| # of comorbidities                                             |                    | -1.45***<br>(0.19) |                    |                    |                    |                    |
| # of medications                                               |                    | 0.15<br>(0.21)     | -0.17<br>(0.38)    | -0.17<br>(0.38)    | -0.17<br>(0.38)    | -0.17<br>(0.38)    |
| Binary indicators for eight medication categories <sup>b</sup> |                    | Yes                | Yes                | Yes                | Yes                | Yes                |
| Age                                                            |                    | 0.02<br>(0.05)     | -2.24<br>(1.59)    | -2.26<br>(1.59)    | -2.25<br>(1.59)    | -2.24<br>(1.59)    |
| Female                                                         |                    | 2.68<br>(1.48)     |                    |                    |                    |                    |
| Employed                                                       |                    | 9.85***<br>(1.70)  |                    |                    |                    |                    |
| Nonlinear treatment trend <sup>c</sup>                         |                    | 0.30<br>(3.43)     | -1.12<br>(3.37)    | -0.68<br>(3.37)    | -0.93<br>(3.37)    | -1.13<br>(3.38)    |
| Month- and year-fixed effects                                  |                    | Yes                | Yes                | Yes                | Yes                | Yes                |
| Patient-fixed effects                                          |                    |                    | Yes                | Yes                | Yes                | Yes                |
| # of patients                                                  | 3,108              | 2,673              | 1,562              | 1,562              | 1,562              | 1,562              |
| # of consults                                                  | 16                 | 16                 | 16                 | 16                 | 16                 | 16                 |
| <i>N</i>                                                       | 8,149              | 7,072              | 6,623              | 6,623              | 6,623              | 6,623              |
| <i>R</i> <sup>2</sup>                                          | 0.04               | 0.09               | 0.41               | 0.41               | 0.41               | 0.41               |
| Effect sizes [Treatment]                                       | [0.43***]          | [0.35***]          | [0.38***]          | [0.43***]          | [0.37***]          | [0.38***]          |

Notes: Standard errors clustered at the patient level are displayed in parentheses. \*  $p < 0.05$ , \*\*  $p < 0.01$ , \*\*\*  $p < 0.001$ .

<sup>a</sup>Includes binary indicators for simple analgesics, opioids, antidepressants, benzodiazepines, GABA analogues, antipsychotics, compound analgesics, and other pain medications. <sup>b</sup>Includes fixed effects for the primary diagnosis categories of pain, psychiatric, neurological, and other. <sup>c</sup>Measured as the reciprocal of the number of follow-up consults since commencing treatment.



**eTable 8.** OLS regression results, estimating social functioning (increasing from 0 to 100).

|                                                                | General effect     |                    |                    | Balanced           | CBD-<br>dominant   | THC-<br>dominant   |
|----------------------------------------------------------------|--------------------|--------------------|--------------------|--------------------|--------------------|--------------------|
|                                                                | (1)                | (2)                | (3)                | (4)                | (5)                | (6)                |
| <i>Outcome: Social functioning (mean at baseline = 36.57)</i>  |                    |                    |                    |                    |                    |                    |
| Treatment                                                      | 15.97***<br>(0.73) | 17.03***<br>(1.18) | 18.31***<br>(1.25) | 20.19***<br>(1.40) | 18.08***<br>(1.33) | 17.10***<br>(1.62) |
| Other                                                          |                    |                    |                    | 17.24***<br>(1.30) | 18.59***<br>(1.33) | 18.43***<br>(1.26) |
| Primary diagnosis categories <sup>a</sup>                      |                    | Yes                | Yes                | Yes                | Yes                | Yes                |
| # of comorbidities                                             |                    | -1.03***<br>(0.13) |                    |                    |                    |                    |
| # of medications                                               |                    | 0.20<br>(0.16)     | -0.24<br>(0.20)    | -0.23<br>(0.20)    | -0.23<br>(0.20)    | -0.24<br>(0.20)    |
| Binary indicators for eight medication categories <sup>b</sup> |                    | Yes                | Yes                | Yes                | Yes                | Yes                |
| Age                                                            |                    | 0.21***<br>(0.03)  | -0.59<br>(0.89)    | -0.61<br>(0.89)    | -0.59<br>(0.89)    | -0.56<br>(0.89)    |
| Female                                                         |                    | 1.68<br>(1.07)     |                    |                    |                    |                    |
| Employed                                                       |                    | 10.99***<br>(1.15) |                    |                    |                    |                    |
| Nonlinear treatment trend <sup>c</sup>                         |                    | -6.08**<br>(2.22)  | -6.39***<br>(1.86) | -5.87**<br>(1.86)  | -6.31***<br>(1.87) | -6.51***<br>(1.87) |
| Month- and year-fixed effects                                  |                    | Yes                | Yes                | Yes                | Yes                | Yes                |
| Patient-fixed effects                                          |                    |                    | Yes                | Yes                | Yes                | Yes                |
| # of patients                                                  | 3,081              | 2,647              | 1,535              | 1,535              | 1,535              | 1,535              |
| # of consults                                                  | 16                 | 16                 | 16                 | 16                 | 16                 | 16                 |
| <i>N</i>                                                       | 7,927              | 6,893              | 6,558              | 6,558              | 6,558              | 6,558              |
| <i>R</i> <sup>2</sup>                                          | 0.07               | 0.18               | 0.61               | 0.61               | 0.61               | 0.61               |
| Effect sizes [Treatment]                                       | [0.60***]          | [0.64***]          | [0.68***]          | [0.75***]          | [0.67***]          | [0.64***]          |

Notes: Standard errors clustered at the patient level are displayed in parentheses. \*  $p < 0.05$ , \*\*  $p < 0.01$ , \*\*\*  $p < 0.001$ .

<sup>a</sup>Includes binary indicators for simple analgesics, opioids, antidepressants, benzodiazepines, GABA analogues, antipsychotics, compound analgesics, and other pain medications. <sup>b</sup>Includes fixed effects for the primary diagnosis categories of pain, psychiatric, neurological, and other. <sup>c</sup>Measured as the reciprocal of the number of follow-up consults since commencing treatment.

**eTable 9.** OLS regression results, estimating vitality (increasing from 0 to 100).

| <i>Outcome: Vitality (mean at baseline = 30.19)</i>            |                    |                    |                    |                    |                    |                    |
|----------------------------------------------------------------|--------------------|--------------------|--------------------|--------------------|--------------------|--------------------|
|                                                                | General effect     |                    |                    | Balanced           | CBD-<br>dominant   | THC-<br>dominant   |
|                                                                | (1)                | (2)                | (3)                | (4)                | (5)                | (6)                |
| Treatment                                                      | 10.41***<br>(0.58) | 11.85***<br>(0.99) | 12.91***<br>(0.96) | 13.66***<br>(1.11) | 13.08***<br>(1.00) | 12.52***<br>(1.20) |
| Other                                                          |                    |                    |                    | 12.48***<br>(0.97) | 12.69***<br>(1.04) | 12.94***<br>(0.97) |
| Primary diagnosis categories <sup>a</sup>                      |                    | Yes                | Yes                | Yes                | Yes                | Yes                |
| # of comorbidities                                             |                    | -1.01***<br>(0.10) |                    |                    |                    |                    |
| # of medications                                               |                    | 0.07<br>(0.13)     | -0.09<br>(0.16)    | -0.09<br>(0.16)    | -0.09<br>(0.16)    | -0.09<br>(0.16)    |
| Binary indicators for eight medication categories <sup>b</sup> |                    | Yes                | Yes                | Yes                | Yes                | Yes                |
| Age                                                            |                    | 0.04<br>(0.03)     | -0.90<br>(0.66)    | -0.90<br>(0.66)    | -0.89<br>(0.66)    | -0.89<br>(0.66)    |
| Female                                                         |                    | -3.10***<br>(0.87) |                    |                    |                    |                    |
| Employed                                                       |                    | 2.73**<br>(1.01)   |                    |                    |                    |                    |
| Nonlinear treatment trend <sup>c</sup>                         |                    | -6.65***<br>(1.81) | -6.46***<br>(1.39) | -6.26***<br>(1.38) | -6.52***<br>(1.39) | -6.50***<br>(1.39) |
| Month- and year-fixed effects                                  |                    | Yes                | Yes                | Yes                | Yes                | Yes                |
| Patient-fixed effects                                          |                    |                    | Yes                | Yes                | Yes                | Yes                |
| # of patients                                                  | 3,103              | 2,668              | 1,554              | 1,554              | 1,554              | 1,554              |
| # of consults                                                  | 16                 | 16                 | 16                 | 16                 | 16                 | 16                 |
| <i>N</i>                                                       | 8,096              | 7,031              | 6,601              | 6,601              | 6,601              | 6,601              |
| <i>R</i> <sup>2</sup>                                          | 0.05               | 0.14               | 0.63               | 0.63               | 0.63               | 0.63               |
| Effect sizes [Treatment]                                       | [0.50***]          | [0.57***]          | [0.62***]          | [0.66***]          | [0.63***]          | [0.60***]          |

Notes: Standard errors clustered at the patient level are displayed in parentheses. \*  $p < 0.05$ , \*\*  $p < 0.01$ , \*\*\*  $p < 0.001$ .

<sup>a</sup>Includes binary indicators for simple analgesics, opioids, antidepressants, benzodiazepines, GABA analogues, antipsychotics, compound analgesics, and other pain medications. <sup>b</sup>Includes fixed effects for the primary diagnosis categories of pain, psychiatric, neurological, and other. <sup>c</sup>Measured as the reciprocal of the number of follow-up consults since commencing treatment.

**eTable 10.** Reported adverse events across different severity levels.

| Adverse Event            | Severity |          |          |          |             |          | Total  |  |
|--------------------------|----------|----------|----------|----------|-------------|----------|--------|--|
|                          | Mild     | Moderate | Severe   | Serious  | Unspecified |          |        |  |
|                          | <i>N</i> | <i>N</i> | <i>N</i> | <i>N</i> | <i>N</i>    | <i>N</i> | (%)    |  |
| Sedation/sleepiness      | 288      | 116      | 7        | 0        | 0           | 411      | (13.1) |  |
| Dry mouth                | 284      | 74       | 1        | 0        | 0           | 359      | (11.4) |  |
| Lethargy/tiredness       | 153      | 75       | 4        | 0        | 0           | 232      | (7.4)  |  |
| Dizziness                | 150      | 70       | 4        | 0        | 0           | 224      | (7.1)  |  |
| Concentration difficulty | 138      | 59       | 3        | 0        | 0           | 200      | (6.4)  |  |
| Nausea                   | 115      | 74       | 10       | 0        | 0           | 199      | (6.3)  |  |
| Diarrhoea/loose stools   | 105      | 40       | 8        | 0        | 2           | 155      | (4.9)  |  |
| Feeling high             | 105      | 42       | 1        | 0        | 0           | 148      | (4.7)  |  |
| Increased appetite       | 91       | 27       | 0        | 0        | 0           | 118      | (3.7)  |  |
| Headache                 | 59       | 34       | 6        | 0        | 0           | 100      | (3.2)  |  |
| Anxiety/panic attack     | 31       | 47       | 6        | 0        | 0           | 84       | (2.7)  |  |
| Vivid dreams             | 35       | 17       | 0        | 0        | 1           | 53       | (1.7)  |  |
| Hallucination            | 12       | 27       | 5        | 1        | 0           | 45       | (1.4)  |  |
| Impaired coordination    | 29       | 10       | 1        | 0        | 0           | 40       | (1.3)  |  |
| Palpitations             | 23       | 8        | 1        | 0        | 0           | 32       | (1.0)  |  |
| Other <sup>a</sup>       | 287      | 202      | 28       | 1        | 1           | 519      | (16.5) |  |

*Notes:* <sup>a</sup>Includes abdominal pain, absence seizures, acid reflux, aggression, agitation/disorientation, alertness, allergic conjunctivitis, allergic reaction/hives, altered taste, amotivational, anger/stress, anosmia, apathy, arm pain, atrial fibrillation, auditory hallucination, bad taste in mouth, behavioural change, bleeding gums, bloating, blurred vision, bowel movement change, bradycardia, brain fog, bruxism, burning throat, burping, butterflies in the stomach, chest pain, chills/shivers, clumsiness, cognitive impairment, collapsing, confusion, constipation, cough, decreased appetite, delirium, depression, drug interaction, dry eyes, dry skin, dysphagia, dysphoria, dysuria, edema, elevated liver function tests, emotional fragility, epigastric pain, erectile dysfunction, euphoria, fecal incontinence, feeling blunted, feeling drunk, feeling flat, feeling stoned, feeling unbalanced, feeling warm, fever, flatulence, foot numbness, funny turn, gelastic seizures, globus pharyngeus, goosebumps, hangover, hay fever, head banging, heartburn, heavy legs, hiccups, high blood pressure, hot flashes, hyperactivity, hyperacusis, hyponatraemia, hyponatremia, impaired movement, increased body pain, increased seizures, indigestion, insomnia, intoxication, intrusive thoughts, irritability, itchy skin, jittery, lack of control, lack of motivation, leg pain, lightheadedness, low blood pressure, low mood, mania, memory loss, metallic smell on body, metallic taste, mouth ulcers, muscle rigidity, muscle twitch, muscle twitch/tremors, nightmares, ocular hypertension, out-of-body experience, overthinking, paradoxical reaction, paranoia, phlegm, pressure in the head, pseudobulbar affect, psychogenic nonepileptic seizures, racing thoughts, restless arms, salty taste in mouth, seizure, shakes/tremors, shortness of breath, sinus pain, skin rash, sleeping difficulty, slurred speech, sore throat, sweating, swollen lips, tachycardia, throat irritation, tics, tingling tongue, tinnitus, ulcerative colitis, unsteadiness, urinary incontinence, use disorder/dependency, vertigo, voice change, vomiting, wakefulness, weakness, weight change, wheeze.

**eFigure.** Flow of patients through the study of the association of medicinal cannabis with health-related quality of life.

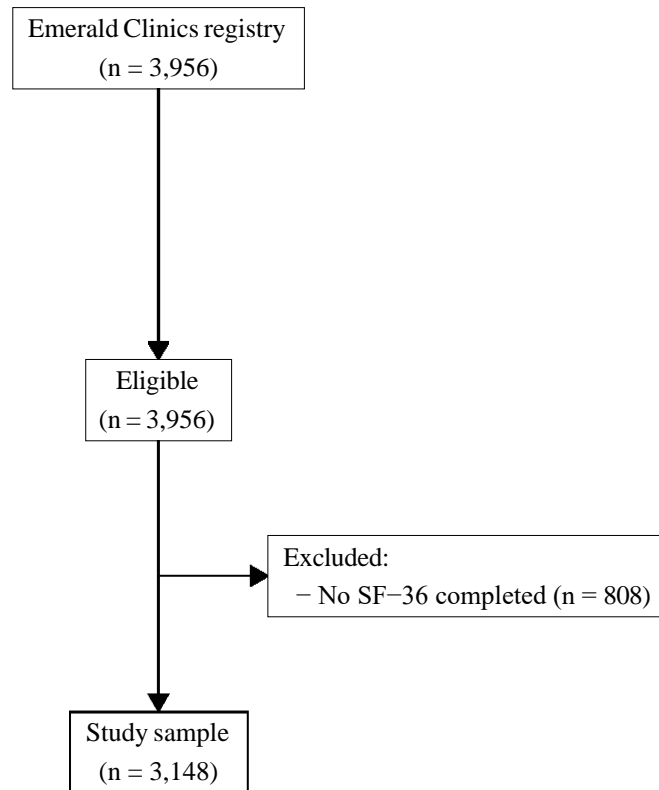

Supplement: jamanetwopen-e2312522-s001.pdf [file jamanetwopen-e2312522-s001.pdf]
