# Supplementary material for: Assessment of Medical Cannabis and Health-Related Quality of Life
Source: PubMed Central journal article supplement — JAMA Netw Open. 2023 May 9;6(5):e2312522. doi: 10.1001/jamanetworkopen.2023.12522 (PMC10170337; doi:10.1001/jamanetworkopen.2023.12522), 2023-05-09
Supplement: jamanetwopen-e2312522-s002.pdf [file jamanetwopen-e2312522-s002.pdf]

## Data Sharing Statement

Arkell. Assessment of Medical Cannabis and Health-Related Quality of Life. *JAMA Netw Open*. Published May 09, 2023. doi:10.1001/jamanetworkopen.2023.12522

### Data

**Data available:** No

### Additional Information

**Explanation for why data not available:** Dataset is privately owned and will not be publicly available. Any reasonable requests to obtain the dataset for research purposes will, however, be considered on a case-by-case basis.
